# Supplementary material for: The density and biomass of mesozooplankton and ichthyoplankton in the Negro and the Amazon Rivers during the rainy season: the ecological importance of the confluence boundary
Source: PeerJ. 2017 May 11;5:e3308. doi: 10.7717/peerj.3308 (PMC5429737; doi:10.7717/peerj.3308)
Supplement: Table S1 [file peerj-05-3308-s001.xlsx]

## Sheet: TableS1
Table S1. Average (mean ± SD) density (inds m-3) and relative density (%RA) of various cladoceran species at the Amazon (Solimões) and the Negro Rivers at the center of the Amazon basin.
	Amazon River										Confluence					Negro River
	Bank (St. 1)			%RA		Center (St. 2)			%RA		(St. 3)			%RA		Center (St. 4)			%RA		Bank (St. 5)			%RA
Alona incredibilis	1.27782	±	3.13	0.153226		0	±	0	0		4.05461	±	6.32019	0.297472		1.70376	±	4.17333	0.0885467		0	±	0	0
Biapertura sp.	0	±	0	0		0	±	0	0		0	±	0	0		0	±	0	0		2.77566	±	6.79894	0.138834
Bosmina hagmanni	28.4953	±	28.0999	3.41695		15.6935	±	9.77481	3.79012		109.008	±	78.7703	7.99748		137.744	±	115.296	7.15875		227.039	±	123.177	11.3561
Bosmina longirostris	7.82663	±	8.40778	0.938512		6.10641	±	7.09677	1.47475		108.651	±	78.373	7.97134		118.652	±	134.745	6.16652		255.718	±	195.895	12.7906
Bosminopsis brandorffi	2.55563	±	6.26	0.306453		0.79715	±	1.95261	0.192519		6.38909	±	6.54255	0.468743		9.24047	±	11.2619	0.48024		15.2732	±	18.7988	0.763937
Bosminopsis deitersi	73.2828	±	37.4339	8.78754		28.8027	±	25.7464	6.95613		501.096	±	315.562	36.7636		759.454	±	309.341	39.4699		704.685	±	424.205	35.2471
Bosminopsis negrensis	0	±	0	0		0	±	0	0		1.1058	±	2.70865	0.0811287		0	±	0	0		0	±	0	0
Ceriodaphnia cornuta	79.64	±	34.1508	9.54984		47.157	±	28.9984	11.3889		122.894	±	96.0185	9.01628		131.842	±	142.776	6.85201		89.9754	±	79.9455	4.50042
Chydorus evrinotus	0	±	0	0		0.153338	±	0.3756	0.0370326		0	±	0	0		0	±	0	0		0	±	0	0
Chydoros sphaericus	2.23618	±	3.01034	0.268146		0.359249	±	0.879977	0.086762		0	±	0	0		0	±	0	0		0	±	0	0
Daphnia gessneri	2.55563	±	6.26	0.306453		0.819263	±	0.985014	0.19786		3.98089	±	6.22401	0.292063		0	±	0	0		0	±	0	0
Diaphanosomoa birgei	0	±	0	0		0	±	0	0		0	±	0	0		1.53338	±	3.756	0.079692		0	±	0	0
Diaphanosoma polyspina	546.399	±	170.381	65.5202		265.97	±	175.908	64.2343		461.951	±	179.718	33.8917		704.983	±	488.242	36.639		667.205	±	333.512	33.3724
Diaphanosoma spinulosum	0.479181	±	1.17375	0.0574599		0.631888	±	1.5478	0.152607		0.737202	±	1.80577	0.0540858		0	±	0	0		0	±	0	0
Ephemeroporous sp.	0	±	0	0		0	±	0	0		0	±	0	0		26.3584	±	18.6363	1.36988		6.08153	±	7.96379	0.304188
Evryalona brasiliensis	0.479181	±	1.17375	0.0574599		0.153338	±	0.3756	0.0370326		0	±	0	0		0	±	0	0		0	±	0	0
Holopedium amazonicum	0	±	0	0		0	±	0	0		2.72765	±	4.60028	0.200117		5.11127	±	12.52	0.26564		2.61334	±	4.06026	0.130715
Ilyocryptus spinifer	8.08219	±	4.16493	0.969157		5.73523	±	4.46972	1.38511		0.842868	±	1.3494	0.0618381		3.87363	±	6.44409	0.201318		5.48882	±	6.84971	0.274541
Kurzia latissima	0	±	0	0		0.359249	±	0.879977	0.086762		0	±	0	0		0	±	0	0		0	±	0	0
Leydigia cf. propinqva	0	±	0	0		0	±	0	0		0	±	0	0		4.25939	±	6.79369	0.221367		0	±	0	0
Macrothrix laticornis	0	±	0	0		0.306676	±	0.7512	0.0740651		0	±	0	0		0	±	0	0		0	±	0	0
Macrothrix sp.	0	±	0	0		0	±	0	0		0	±	0	0		0	±	0	0		1.38783	±	3.39947	0.0694168
Moina minuta	78.8733	±	13.7116	9.4579		40.864	±	29.2809	9.86904		37.9266	±	17.0364	2.78253		19.3778	±	24.6186	1.00709		17.9047	±	7.98273	0.895562
Moina reticulata	1.27782	±	3.13	0.153226		0.153338	±	0.3756	0.0370326		1.6587	±	2.59334	0.121693		0	±	0	0		1.08022	±	2.64598	0.0540306
Moinodaphnia macleayi	0	±	0	0		0	±	0	0		0	±	0	0		0	±	0	0		2.04198	±	3.25724	0.102137
Plevroxus sp.	0.479181	±	1.17375	0.0574599		0	±	0	0		0	±	0	0		0	±	0	0		0	±	0	0
