# Supplementary material for: The density and biomass of mesozooplankton and ichthyoplankton in the Negro and the Amazon Rivers during the rainy season: the ecological importance of the confluence boundary
Source: PeerJ. 2017 May 11;5:e3308. doi: 10.7717/peerj.3308 (PMC5429737; doi:10.7717/peerj.3308)
Supplement: Table S2 [file peerj-05-3308-s002.xlsx]

## Sheet: TableS2
Table S2. Average (mean ± SD) density (inds m-3) and relative density (%RA) of various copepod species at the Amazon (Solimões) and the Negro Rivers at the center of the Amazon basin.
	Amazon River										Confluence					Negro River
	Bank (St. 1)			%RA		Center (St. 2)			%RA		(St. 3)			%RA		Center (St. 4)			%RA		Bank (St. 5)			%RA
Calanoids
Aspinus acicularis	0.479181	±	1.17375	0.105872		0	±	0	0		0.921503	±	2.25721	0.107188		1.70376	±	4.17333	0.162704		0	±	0	0
Argyrodiaptomus sp.	3.514	±	3.9125	0.776398		0.613352	±	1.5024	0.292345		2.58021	±	4.51442	0.300125		3.87363	±	6.44409	0.369922		1.55231	±	3.80237	0.324353
Dasydiaptomus coronatus	1.50144	±	2.54403	0.331733		3.12768	±	3.5576	1.49076		4.08656	±	6.21828	0.475341		0	±	0	0		2.97691	±	5.26983	0.622021
Diaptomus ohlei	11.3406	±	14.4254	2.50565		2.58544	±	3.75281	1.23231		2.32219	±	3.60363	0.270113		1.318	±	3.22843	0.125866		0.816475	±	1.99995	0.170601
Dactylodiaptomus pearsei	44.6597	±	25.4831	9.86731		8.91375	±	4.30654	4.2486		66.4514	±	64.8232	7.72951		52.2105	±	43.2051	4.98596		53.3073	±	38.375	11.1385
Notodiaptomus simillimus	1.27782	±	3.13	0.282326		1.14447	±	1.5497	0.545496		1.27782	±	3.13	0.148633		0	±	0	0		0.816475	±	1.99995	0.170601
Notodiaptomus sp.	1.27782	±	3.13	0.282326		2.82101	±	3.93991	1.34459		2.27058	±	3.82823	0.26411		0	±	0	0		0	±	0	0
Rhacodiaptomus calatus	0	±	0	0		0	±	0	0		0.511127	±	1.252	0.0594534		0	±	0	0		0	±	0	0
Rhacodiaptomus retroflexus	0	±	0	0		0	±	0	0		0	±	0	0		0	±	0	0		1.98199	±	4.85485	0.414133
Unidentified calanoid copepodites	224.129	±	123.741	49.52		84.3685	±	61.3802	40.2129		245.098	±	223.539	28.5093		438.484	±	316.669	41.8741		300.19	±	157.598	62.7243
Cyclopoids
Ectocyclops sp.	2.90703	±	4.45476	0.642292		0.306676	±	0.7512	0.146172		0	±	0	0		0	±	0	0		1.63295	±	3.9999	0.341203
Eragaselidae	0.479181	±	1.17375	0.105872		0	±	0	0		0	±	0	0		0	±	0	0		0	±	0	0
Eucyclops sp.	1.27782	±	3.13	0.282326		0	±	0	0		2.38362	±	3.70708	0.277259		0	±	0	0		1.08022	±	2.64598	0.22571
Mesocyclops longisetus	2.52369	±	4.90984	0.557595		2.47194	±	4.46319	1.17821		0.737202	±	1.80577	0.0857501		1.27782	±	3.13	0.122028		1.63295	±	3.9999	0.341203
Mesocyclops meridianus	5.68629	±	4.79054	1.25635		0.613352	±	1.5024	0.292345		4.76724	±	7.41417	0.554517		1.27782	±	3.13	0.122028		3.20749	±	5.17217	0.670201
Metacyclops cf. brauni	0	±	0	0		0.306676	±	0.7512	0.146172		0	±	0	0		0	±	0	0		0	±	0	0
Microcyclops cf. alius	0.511127	±	1.252	0.112931		0	±	0	0		0	±	0	0		0	±	0	0		0	±	0	0
Microcyclops cf. auceps	0.511127	±	1.252	0.112931		0	±	0	0		0	±	0	0		0	±	0	0		0	±	0	0
Microcyclops brasilianus	0	±	0	0		0	±	0	0		1.02225	±	2.504	0.118907		0	±	0	0		0	±	0	0
Microcyclops ceibaensis	0	±	0	0		0.306676	±	0.7512	0.146172		0	±	0	0		0	±	0	0		0	±	0	0
Microcyclops sp.	3.25843	±	3.62662	0.719932		0.460014	±	1.1268	0.219259		0.737202	±	1.80577	0.0857501		0	±	0	0		0.816475	±	1.99995	0.170601
Oithona amazonica	40.6346	±	24.1233	8.97798		43.3692	±	26.7917	20.6713		348.832	±	405.364	40.5755		388.498	±	556.268	37.1005		54.8883	±	53.4352	11.4688
Thermocyclops decipiens	15.6852	±	12.153	3.46556		6.29866	±	4.46646	3.00216		5.66663	±	7.03287	0.659132		0	±	0	0		0.816475	±	1.99995	0.170601
Thermocyclops cf. minutus	5.11127	±	12.52	1.12931		1.5943	±	3.90522	0.759899		2.38362	±	3.70708	0.277259		0	±	0	0		1.55231	±	3.80237	0.324353
Thermocyclops sp.	0	±	0	0		0.460014	±	0.769751	0.219259		0	±	0	0		0	±	0	0		0	±	0	0
Unidentified cyclopoids	0.479181	±	1.17375	0.105872		0	±	0	0		0	±	0	0		0	±	0	0		0	±	0	0
Unidentified cyclopod copepodites	78.0107	±	30.7955	17.236		49.0174	±	24.3503	23.3634		157.287	±	168.337	18.2953		143.091	±	135.39	13.6649		41.9673	±	45.6115	8.76901
Nauplii	7.34745	±	9.72947	1.62338		1.02517	±	1.77	0.488634		10.3749	±	10.4938	1.20679		15.4142	±	13.7164	1.47201		9.35047	±	5.66451	1.95377
