# Supplementary material for: The density and biomass of mesozooplankton and ichthyoplankton in the Negro and the Amazon Rivers during the rainy season: the ecological importance of the confluence boundary
Source: PeerJ. 2017 May 11;5:e3308. doi: 10.7717/peerj.3308 (PMC5429737; doi:10.7717/peerj.3308)
Supplement: Table S3 [file peerj-05-3308-s003.xlsx]

## Sheet: TableS4
Table S3. Average (mean ± SD) density (inds m-3) and relative density (%RA) of various insect larvae at the Amazon (Solimões) and the Negro Rivers at the center of the Amazon basin.
	Amazon River										Confluence					Negro River
	Babk (St. 1)					Center (St. 2)					(St. 3)					Center (St. 4)					Bank (St. 5)
	Abundance			%RA		Abundance			%RA		Abundance			%RA		Abundance			%RA		Abundance			%RA
Diptera larvae
Chaoboridae	0.835496	±	1.12545	19.7674		1.03208	±	1.17583	30.6132		2.01502	±	1.81218	41.4141		3.19918	±	2.42937	78.3379		4.26812	±	3.80498	71.203
Dixidae	0	±	0	0		0.442321	±	0.740145	13.12		0	±	0	0		0.14744	±	0.361154	3.61035		0.320518	±	0.501672	5.34704
Tipulidae	0.0982936	±	0.240769	2.32558		0	±	0	0		0	±	0	0		0.0982936	±	0.240769	2.4069		0	±	0	0
Psychodidae	0	±	0	0		0	±	0	0		0	±	0	0		0	±	0	0		0	±	0	0
Chironomidae	2.01502	±	2.57353	47.6744		1.60208	±	0.808547	47.5202		2.3099	±	1.79288	47.4747		0.638909	±	0.755647	15.6449		0.943741	±	0.504574	15.744
Other diptera	0.0982936	±	0.240769	2.32558		0	±	0	0		0.442321	±	0.740145	9.09091		0	±	0	0		0	±	0	0
Coleoptera larvae	1.17952	±	1.44462	27.907		0.294881	±	0.722308	8.74664		0.0982936	±	0.240769	2.0202		0	±	0	0		0.461923	±	0.742162	7.70602
